# Supplementary material for: Coronary blood vessels from distinct origins converge to equivalent states during mouse and human development
Source: eLife. 2021 Dec 15;10:e70246. doi: 10.7554/eLife.70246 (PMC8673841; doi:10.7554/eLife.70246)
Supplement: Figure 3—source data 1. [file elife-70246-fig3-data1.xlsx]

## Sheet: Sheet1
	# of cells Erg+,Car4+,Td+	# of cells Erg+,Car4+,Td-	# of cells Erg+,Car4-,Td+	# of cells Erg+,Car4-,Td-
Heart1_section1_ventral	68	10	128	55
Heart1_section1_RV	19	138	39	108
Heart1_section1_LV	30	17	114	168
Heart1_section1_dorsal	22	97	33	124
Heart1_section1_septum	4	0	132	8
Heart1_section2_ventral	43	12	205	57
Heart1_section2_LV	2	8	97	140
Heart1_section2_RV	24	50	77	201
Heart1_section2_dorsal	17	162	39	142
Heart1_section2_septum	1	0	136	30
Heart1_section3_ventral	28	22	200	38
Heart1_section3_LV	39	98	35	51
Heart1_section3_RV	35	52	29	87
Heart1_section3_dorsal	46	92	64	120
Heart1_section3_septum	2	0	145	26
	# of cells Erg+,Car4+,Td+	# of cells Erg+,Car4+,Td-	# of cells Erg+,Car4-,Td+	# of cells Erg+,Car4-,Td-
Heart2_section1_ventral	37	2	244	39
Heart2_section1_LV	11	53	46	155
Heart2_section1_RV	16	164	14	128
Heart2_section1_dorsal	45	72	44	85
Heart2_section1_septum	0	0	145	3
Heart2_section2_ventral	57	3	166	70
Heart2_section2_LV	18	48	58	195
Heart2_section2_RV	3	160	4	176
Heart2_section2_dorsal	12	15	84	139
Heart2_section2_septum	0	0	135	6
Heart2_section3_ventral	36	10	203	24
Heart2_section3_LV	42	50	63	140
Heart2_section3_RV	6	63	31	204
Heart2_section3_dorsal	43	97	69	44
Heart2_section3_septum	3	0	205	6
	# of cells Erg+,Car4+,Td+	# of cells Erg+,Car4+,Td-	# of cells Erg+,Car4-,Td+	# of cells Erg+,Car4-,Td-
Heart3_section1_LV	23	63	66	121
Heart3_section1_ventral	29	0	169	5
Heart3_section1_dorsal	4	45	62	91
Heart3_section1_RV	2	61	38	146
Heart3_section1_septum	27	0	200	10
Heart3_section2_LV	19	72	45	155
Heart3_section2_ventral	38	1	120	7
Heart3_section2_dorsal	25	69	54	74
Heart3_section2_RV	11	94	18	191
Heart3_section2_septum	26	0	142	9
Heart3_section3_LV	6	55	45	157
Heart3_section3_ventral	11	2	127	17
Heart3_section3_dorsal	8	131	14	199
Heart3_section3_RV	11	154	12	125
Heart3_section3_septum	0	0	191	18
