# Supplementary material for: Coronary blood vessels from distinct origins converge to equivalent states during mouse and human development
Source: eLife. 2021 Dec 15;10:e70246. doi: 10.7554/eLife.70246 (PMC8673841; doi:10.7554/eLife.70246)
Supplement: Figure 4—source data 1. [file elife-70246-fig4-data1.xlsx]

## Sheet: Apex
Apex sections
Heart ID	Type 1 (Erg+, EdU+, tdTomato+)	Type 2 (Erg+, EdU+, tdTomato-)	Type 3 (Erg+, EdU-, tdTomato+)	Type 4 (Erg+, EdU-, tdTomato-)
N2	141	3	513	85
N3	38	15	555	246
8_29_A	20	30	172	325
8_29_B	5	21	6	146
8_30_A	29	135	96	303
9_9_A	14	103	83	712
9_9_B	30	283	75	530

## Sheet: Stitch section
Stitch sections
Heart ID	Type 1 (Erg+, EdU+, tdTomato+)	Type 2 (Erg+, EdU+, tdTomato-)	Type 3 (Erg+, EdU-, tdTomato+)	Type 4 (Erg+, EdU-, tdTomato-)
N1	28	46	452	464
N1	22	39	415	450
N2	207	70	368	209
N2	104	141	259	364
N3	15	50	193	428
N3	3	42	30	545
B2	25	36	82	633
B2	16	63	92	684
8_29_A	26	10	279	225
8_29_A	12	64	133	285
8_29_B	74	115	152	203
8_29_B	70	211	82	227
8_30_A	143	43	245	54
8_30_A	65	62	105	110
8_30_B	2	7	54	213
8_30_B	13	11	161	252
8_30_C	51	31	102	120
8_30_C	56	5	158	47
9_9_A	86	117	554	376
9_9_A	19	33	330	311
9_9_B	60	40	210	185
9_9_B	28	98	83	350

## Sheet: uninjured
Heart/location	Type 1 (Erg+EdU+)	Type 2 (Erg+EdU-)
h1 stitch	2	650
h2 stitch	6	329
h3 stitch	2	391
h1 apex	2	595
h2 apex	7	292
h3 apex	5	536

## Sheet: Arteries
Heart ID	Location	# of large arteries in injury area	# proliferating vessles	# of ECs (Erg+, Td+)	# proliferating ECs (Erg+, Td+, Edu +)
N2	Apex	1	1	25	5
N1	Apex	0	0
N3	Apex	0	0
B2	Apex	0	0
8_29_B	Apex	0	0
8_30_A	Apex	2	2	14	4
8_30_B	Apex	0	0
9_9_A	Apex	3	1	52	7
9_9_B	Apex	2	1	121	23
		8
Stitch
N1	Stitch	1	1	25	2
N2	Stitch	1	1	36	3
N3	Stitch	1	1	18	1
B2	Stitch	1	1	39	3
8_29_A	Stitch	2	0	24	0
8_29_B	Stitch	4	4	33	24
8_30_A	Stitch	4	4	44	14
8_30_B	Stitch	2	1	35	3
8_30_C	Stitch	1	1	9	8
9_9_A	Stitch	1	1	23	2
9_9_B	Stitch	1	1	12	14
		19
