# Supplementary material for: Coronary blood vessels from distinct origins converge to equivalent states during mouse and human development
Source: eLife. 2021 Dec 15;10:e70246. doi: 10.7554/eLife.70246 (PMC8673841; doi:10.7554/eLife.70246)
Supplement: Table 1—source data 1. [file elife-70246-table1-data1.xlsx]

## Sheet: Sheet1
Differentially expressed genes between e12 Endo and SV by Wilcoxon Rank Sum test.
	p_val	avg_logFC in Endo relative to SV	percent of Endo cells expressing	percent of SV cells expressing	p_val_adj
Aplnr	7.77179e-300	-0.86391	0.17	0.838	2.1761e-295
Hoxa5	9.95596e-274	-0.671624	0.093	0.655	2.78767e-269
Cdkn1c	6.3314e-260	3.02666	0.984	0.887	1.77279e-255
Tmem108	1.84161e-230	1.3514	0.891	0.278	5.15652e-226
Hotairm1	1.33538e-225	-0.428991	0.08	0.556	3.73905e-221
Agr2	2.26839e-222	-0.820503	0.075	0.54	6.35148e-218
Nrk	1.46167e-219	1.23122	0.861	0.249	4.09269e-215
Fabp5	4.44935e-217	1.71441	0.992	0.943	1.24582e-212
Gm13889	2.34416e-216	-0.629026	0.135	0.661	6.56364e-212
Cdh11	8.13806e-214	1.13461	0.881	0.303	2.27866e-209
Cldn11	1.21895e-212	-0.873294	0.119	0.625	3.41305e-208
Zfp503	5.36668e-210	-0.52277	0.152	0.684	1.50267e-205
Bmp4	8.26622e-201	-0.689301	0.088	0.54	2.31454e-196
Irx5	3.49206e-198	1.01075	0.754	0.038	9.77776e-194
Cd81	4.40741e-197	0.602229	0.999	0.995	1.23408e-192
Nr2f2	2.88418e-194	-0.863003	0.861	0.995	8.0757e-190
Tspan13	9.39658e-193	-0.753471	0.653	0.967	2.63104e-188
H19	6.08546e-192	0.918361	0.998	0.985	1.70393e-187
Hand2	8.07266e-192	0.858782	0.818	0.16	2.26034e-187
Adgrg6	7.89664e-191	0.85239	0.805	0.155	2.21106e-186
Ccnd2	7.01975e-188	1.09993	0.872	0.398	1.96553e-183
Maged2	3.76294e-187	0.853801	0.994	0.971	1.05362e-182
Pcdh17	4.35855e-184	-0.597205	0.174	0.678	1.22039e-179
Plvap	1.05351e-176	0.760932	0.994	0.964	2.94982e-172
Igf2	1.32932e-176	0.802403	0.998	0.987	3.7221e-172
Dok4	2.09569e-176	0.816237	0.865	0.424	5.86793e-172
Col13a1	3.70674e-176	0.918669	0.78	0.162	1.03789e-171
Tm4sf1	1.70132e-172	1.48388	0.93	0.619	4.76369e-168
Slco3a1	2.51627e-170	-0.502609	0.241	0.746	7.04556e-166
Igf2r	6.83315e-170	0.921004	0.97	0.804	1.91328e-165
Rassf9	2.39607e-169	-0.383655	0.106	0.537	6.70901e-165
Gm1673	3.70867e-163	0.762104	0.955	0.768	1.03843e-158
Mmrn1	3.65474e-158	-0.278192	0.072	0.442	1.02333e-153
Blvrb	8.51132e-158	0.684325	0.899	0.576	2.38317e-153
Gsta4	3.31039e-156	1.01266	0.793	0.28	9.2691e-152
Gatm	2.26336e-154	0.863165	0.743	0.18	6.33742e-150
Limch1	2.7284e-153	-0.66287	0.589	0.943	7.63953e-149
Olfml3	2.25747e-152	0.62722	0.678	0.074	6.32093e-148
Rap2a	2.46076e-152	0.665743	0.886	0.542	6.89013e-148
Tox	1.62327e-149	-0.306152	0.077	0.44	4.54516e-145
Sdpr	1.18812e-147	0.812631	0.976	0.838	3.32674e-143
Prr15	4.02914e-146	0.799129	0.696	0.123	1.12816e-141
Cav1	6.74198e-146	-0.836716	0.663	0.926	1.88775e-141
Ece1	3.58041e-145	0.644049	0.979	0.897	1.00252e-140
Aqp1	7.13768e-145	-0.608136	0.192	0.633	1.99855e-140
Plagl1	6.31268e-144	0.764752	0.963	0.81	1.76755e-139
Igfbp4	3.9175e-142	0.538553	0.999	0.997	1.0969e-137
Ccnd3	6.65048e-142	0.604753	0.985	0.943	1.86213e-137
Kitl	5.32141e-139	-0.499789	0.244	0.702	1.48999e-134
Trim47	6.06292e-139	0.611446	0.754	0.221	1.69762e-134
Ddah1	7.44196e-135	-0.56146	0.358	0.786	2.08375e-130
Col4a1	1.15522e-134	0.773537	0.984	0.897	3.23461e-130
Cldn5	2.51654e-134	-0.56587	0.123	0.506	7.04632e-130
S100a11	4.27728e-134	0.609008	0.99	0.943	1.19764e-129
Vamp5	2.09241e-133	0.613597	0.969	0.858	5.85874e-129
Hoxb4	6.37059e-131	-0.302678	0.126	0.516	1.78376e-126
Rps19	7.6414e-128	-0.287375	1	1	2.13959e-123
Jam2	1.2841e-127	-0.502883	0.273	0.705	3.59548e-123
Sms	6.27088e-127	0.578389	0.868	0.552	1.75585e-122
Mtdh	1.38123e-126	-0.576579	0.942	0.979	3.86745e-122
Khdrbs3	1.54919e-126	-0.379384	0.133	0.511	4.33773e-122
Edn1	1.6998e-122	-0.707528	0.153	0.543	4.75945e-118
Fst	1.94281e-122	-0.746325	0.064	0.367	5.43986e-118
Cd36	8.42556e-122	-0.282421	0.066	0.373	2.35916e-117
Lmo4	1.18081e-121	0.656706	0.916	0.671	3.30626e-117
Ahr	1.39556e-121	-0.358679	0.137	0.511	3.90756e-117
Tgfbr3	2.17198e-121	0.453747	0.664	0.131	6.08153e-117
Mdk	5.31223e-121	0.680124	0.994	0.969	1.48743e-116
Ctsk	5.33822e-121	0.540433	0.644	0.1	1.4947e-116
Ppp1r14c	1.84538e-119	0.702153	0.546	0.015	5.16706e-115
Sparc	3.77365e-119	0.641933	0.99	0.935	1.05662e-114
Dlk1	4.00065e-116	1.17499	0.535	0.013	1.12018e-111
Eng	9.45599e-115	0.506402	0.987	0.923	2.64768e-110
Cd63	1.64869e-112	0.475302	0.987	0.923	4.61634e-108
Tes	1.83705e-112	-0.407792	0.397	0.791	5.14375e-108
Sord	8.77375e-112	0.473871	0.64	0.146	2.45665e-107
Bex4	1.27527e-111	0.754091	0.786	0.393	3.57074e-107
Tcn2	1.33304e-111	0.494213	0.787	0.362	3.73252e-107
Gnas	1.78963e-109	-0.419981	1	1	5.01097e-105
Fkbp1a	2.81006e-109	-0.453314	0.993	0.998	7.86816e-105
Ptprb	2.97236e-109	-0.514816	0.408	0.776	8.3226e-105
Pde8a	9.34148e-109	-0.383645	0.278	0.674	2.61562e-104
Ccnd1	1.36512e-108	0.862174	0.674	0.226	3.82232e-104
Cgnl1	7.17722e-108	0.588737	0.974	0.884	2.00962e-103
Tshz2	2.76158e-107	-0.571992	0.785	0.941	7.73244e-103
Lmo2	9.16208e-107	-0.517788	0.758	0.933	2.56538e-102
Sdc1	1.07012e-105	0.543797	0.594	0.103	2.99634e-101
Gucy1b3	2.23041e-102	0.43197	0.557	0.07	6.24516e-98
Tbx5	5.65787e-102	-0.260267	0.073	0.357	1.5842e-97
Col4a2	1.059e-100	0.565596	0.95	0.794	2.9652e-96
Ypel3	7.09936e-100	-0.524329	0.692	0.908	1.98782e-95
Wnt16	2.2186e-97	-0.494934	0.04	0.265	6.21208e-93
Bgn	4.68189e-96	0.621792	0.925	0.722	1.31093e-91
Mrpl23	4.10451e-95	-0.443092	0.641	0.872	1.14926e-90
Rps28	6.37249e-95	-0.262206	0.998	1	1.7843e-90
Flrt3	1.26714e-94	-0.261003	0.072	0.342	3.54798e-90
Oaf	1.44025e-94	0.520499	0.791	0.444	4.03269e-90
Kcnj2	1.73956e-94	-0.276288	0.113	0.422	4.87077e-90
Mest	2.00242e-94	0.687985	0.991	0.961	5.60678e-90
Lmo7	2.77368e-94	0.379814	0.607	0.147	7.76631e-90
Acap1	3.83102e-94	0.347749	0.517	0.056	1.07269e-89
Col26a1	1.8153e-93	0.494156	0.528	0.067	5.08284e-89
Camk2n1	3.72488e-93	-0.334214	0.127	0.447	1.04297e-88
Cited2	4.90825e-93	0.5307	0.679	0.214	1.37431e-88
Emcn	1.57772e-92	0.471547	0.993	0.967	4.41761e-88
Nrp2	5.7491e-92	-0.524267	0.284	0.643	1.60975e-87
Fam162a	6.62958e-92	0.45871	0.958	0.861	1.85628e-87
Acer2	1.39303e-91	0.426185	0.747	0.349	3.90049e-87
Ctnnal1	1.81072e-91	-0.300781	0.123	0.432	5.07003e-87
Tmem100	2.40747e-91	0.673672	0.689	0.275	6.74091e-87
Clic1	2.47303e-91	0.317617	0.999	0.995	6.92449e-87
Ifitm2	5.7691e-90	0.339277	1	0.997	1.61535e-85
Skap2	9.40941e-90	-0.343434	0.396	0.741	2.63463e-85
Ly6h	9.54467e-89	-0.364717	0.119	0.426	2.67251e-84
Ebf1	4.01984e-88	0.68119	0.872	0.62	1.12556e-83
Ngfrap1	5.53033e-88	0.49223	0.985	0.957	1.54849e-83
Ephx2	8.02153e-88	-0.321944	0.071	0.326	2.24603e-83
Lamp5	2.14146e-87	-0.294415	0.031	0.226	5.99608e-83
Bambi	2.88068e-87	-0.501397	0.552	0.845	8.06591e-83
Bace2	4.9535e-87	0.69455	0.912	0.736	1.38698e-82
Prcp	3.83659e-86	-0.409599	0.502	0.797	1.07425e-81
Calcrl	6.67312e-86	-0.549393	0.824	0.949	1.86847e-81
Col23a1	7.59743e-86	0.470437	0.828	0.465	2.12728e-81
Il11ra1	1.43804e-85	0.417252	0.896	0.687	4.0265e-81
Nkain4	2.24571e-85	0.533421	0.519	0.088	6.28799e-81
Tspan4	4.41459e-85	0.41768	0.826	0.507	1.23609e-80
Oit3	6.82158e-85	-0.345438	0.107	0.391	1.91004e-80
Nfib	2.79338e-84	0.441253	0.971	0.889	7.82147e-80
Gprc5c	6.89338e-84	0.285399	0.445	0.021	1.93015e-79
Fam213a	6.93023e-83	-0.26071	0.175	0.499	1.94047e-78
Calm2	8.7845e-83	0.359403	0.998	0.987	2.45966e-78
Rdx	2.60956e-82	0.4139	0.999	0.993	7.30676e-78
Smagp	3.22255e-81	0.478927	0.819	0.525	9.02313e-77
Ggt5	5.03219e-81	0.300528	0.433	0.02	1.40901e-76
Gas1	9.58689e-81	-0.411745	0.203	0.516	2.68433e-76
Tec	9.68692e-81	0.35057	0.537	0.126	2.71234e-76
Klhl4	1.30947e-80	0.436646	0.931	0.727	3.66651e-76
Itgb1	1.47984e-80	-0.507565	0.995	1	4.14354e-76
Hmcn1	5.87624e-80	0.453864	0.783	0.391	1.64535e-75
Skil	9.01166e-80	-0.455	0.595	0.83	2.52327e-75
Cthrc1	3.91985e-79	-0.322731	0.094	0.357	1.09756e-74
Marcks	1.05909e-78	0.31834	0.998	0.993	2.96546e-74
Kank1	8.60061e-78	0.363171	0.593	0.183	2.40817e-73
Arhgap28	3.03451e-77	-0.404922	0.469	0.751	8.49662e-73
Csrp2	1.02515e-76	-0.499898	0.957	0.985	2.87041e-72
Fbn2	1.42961e-76	-0.351532	0.344	0.684	4.00291e-72
mt-Nd1	5.29988e-76	-0.344355	0.998	0.998	1.48397e-71
Gpr182	1.76323e-75	0.416573	0.918	0.751	4.93705e-71
Mfng	2.96995e-75	-0.361111	0.268	0.583	8.31586e-71
Tspo	7.44035e-75	0.386381	0.859	0.604	2.0833e-70
Socs2	9.10856e-75	-0.494885	0.141	0.422	2.5504e-70
Gja4	9.88703e-75	0.542279	0.795	0.419	2.76837e-70
Chd3	1.52808e-74	-0.486203	0.733	0.889	4.27864e-70
Lgals9	6.36352e-74	0.446859	0.866	0.601	1.78178e-69
Tcf15	5.98471e-73	-0.503169	0.258	0.581	1.67572e-68
Sfr1	1.35874e-72	0.321785	0.997	0.99	3.80446e-68
Bzw2	1.98454e-72	-0.355678	0.884	0.957	5.5567e-68
Arhgap18	2.8507e-72	-0.312711	0.302	0.622	7.98197e-68
Eln	5.49064e-72	-0.374832	0.085	0.324	1.53738e-67
Igfbp5	9.89661e-72	1.01474	0.748	0.378	2.77105e-67
Hs3st1	2.40188e-71	-0.408506	0.205	0.519	6.72525e-67
Ptpn18	3.76431e-71	-0.364877	0.515	0.784	1.05401e-66
Postn	8.56099e-71	0.3867	0.395	0.02	2.39708e-66
Alad	1.1197e-70	0.386481	0.79	0.499	3.13515e-66
Col3a1	3.04934e-70	0.858543	0.772	0.481	8.53816e-66
Arhgdib	9.43697e-70	0.430581	0.936	0.82	2.64235e-65
Akap13	1.01192e-69	0.406588	0.881	0.676	2.83338e-65
Airn	1.89561e-69	0.358206	0.778	0.432	5.3077e-65
Ybx3	2.98546e-68	-0.38818	0.906	0.975	8.35928e-64
Ralgps2	4.64103e-68	-0.397077	0.641	0.853	1.29949e-63
Wnt11	7.26424e-68	0.317973	0.5	0.116	2.03399e-63
Mrap	9.53139e-68	0.257389	0.37	0.01	2.66879e-63
Ccdc141	1.05943e-67	-0.366024	0.086	0.318	2.9664e-63
Kcnq1ot1	3.23086e-67	0.626708	0.893	0.722	9.04641e-63
Tmem176b	4.9336e-67	0.343104	0.993	0.961	1.38141e-62
Nts	6.3492e-67	-0.727192	0.12	0.385	1.77777e-62
Tmem158	6.83908e-67	-0.453946	0.186	0.471	1.91494e-62
Pomp	8.06285e-67	0.324612	0.994	0.975	2.2576e-62
Lims1	4.66855e-66	0.382084	0.934	0.827	1.3072e-61
Bmp2k	5.08528e-66	-0.315247	0.318	0.619	1.42388e-61
Acadl	6.25026e-66	0.333374	0.914	0.751	1.75007e-61
Ecm1	1.59313e-65	0.500506	0.895	0.689	4.46076e-61
Colec12	2.70322e-65	-0.339209	0.204	0.486	7.56902e-61
Sf3b5	5.07994e-65	0.508832	0.982	0.949	1.42238e-60
Aprt	1.14683e-64	-0.394893	0.944	0.985	3.21113e-60
Lhfp	1.4771e-64	0.345525	0.804	0.501	4.13588e-60
Npr3	1.52831e-64	0.430294	0.907	0.651	4.27926e-60
Gm13305	1.89867e-64	0.330273	0.81	0.54	5.31627e-60
Tnfaip1	3.1002e-64	0.347559	0.917	0.786	8.68055e-60
S100a16	3.85734e-64	-0.482681	0.701	0.882	1.08005e-59
Icam2	9.73795e-64	0.376913	0.994	0.972	2.72663e-59
Klhl13	1.01224e-63	0.335565	0.612	0.267	2.83428e-59
Myzap	1.64303e-63	-0.38801	0.478	0.736	4.60049e-59
Vim	1.87655e-63	0.276285	1	1	5.25435e-59
Jag1	1.99541e-63	-0.289041	0.189	0.468	5.58716e-59
Slc22a23	3.54765e-63	0.276833	0.54	0.162	9.93342e-59
Crip2	6.70738e-63	0.323679	0.999	0.992	1.87807e-58
Wbp5	9.27637e-63	0.33336	0.992	0.971	2.59738e-58
Ncam1	1.30003e-62	-0.415908	0.224	0.498	3.64007e-58
Rgs3	1.54325e-62	0.327408	0.871	0.661	4.32109e-58
Procr	3.32744e-62	-0.470694	0.844	0.928	9.31682e-58
Dennd5b	8.19135e-62	-0.35561	0.639	0.854	2.29358e-57
Sncg	2.44719e-61	-0.398237	0.234	0.502	6.85212e-57
Lrrc42	5.97159e-61	0.334235	0.852	0.635	1.67204e-56
Colec11	4.64903e-60	0.314437	0.435	0.083	1.30173e-55
Col5a2	4.85097e-60	0.402256	0.925	0.804	1.35827e-55
Mgp	6.5826e-60	0.559644	0.594	0.229	1.84313e-55
Slc9a3r1	7.31373e-60	0.306905	0.653	0.321	2.04784e-55
Pmepa1	1.44292e-59	-0.418613	0.408	0.664	4.04016e-55
Aplp2	2.00713e-59	0.39151	0.988	0.948	5.61996e-55
Lbp	2.69895e-59	-0.414226	0.743	0.903	7.55707e-55
Fscn1	6.47355e-59	0.302578	0.987	0.949	1.81259e-54
Sh3glb2	1.04461e-58	0.318813	0.78	0.524	2.92491e-54
Bmx	1.49243e-58	0.378328	0.748	0.43	4.17882e-54
Id2	1.5865e-58	0.541051	0.923	0.782	4.44221e-54
Gmds	1.80451e-58	0.342096	0.841	0.648	5.05264e-54
Soat1	4.61208e-58	0.311399	0.737	0.463	1.29138e-53
Fabp4	5.18982e-58	-0.542105	0.141	0.391	1.45315e-53
Prkag2	8.6884e-58	-0.27078	0.276	0.547	2.43275e-53
mt-Co3	8.86912e-58	-0.25815	0.998	1	2.48335e-53
Smim1	9.69896e-58	0.314612	0.519	0.155	2.71571e-53
Pmp22	1.05768e-57	0.362527	0.652	0.301	2.96152e-53
Gngt2	2.62997e-57	0.422484	0.918	0.838	7.36392e-53
Cebpb	2.85223e-57	0.297162	0.463	0.121	7.98626e-53
Wnt4	4.56824e-57	0.49916	0.452	0.103	1.27911e-52
Anxa6	7.59363e-57	0.305908	0.907	0.73	2.12622e-52
Gchfr	7.72291e-57	-0.280203	0.374	0.651	2.16241e-52
Ctsd	1.55199e-56	0.362882	0.979	0.936	4.34557e-52
Gata5	1.89167e-56	0.280298	0.432	0.093	5.29667e-52
Ctso	2.72458e-56	0.290823	0.658	0.339	7.62883e-52
Egfl7	3.72991e-56	-0.527068	0.995	0.997	1.04437e-51
Pbx1	4.14771e-56	-0.361901	0.719	0.874	1.16136e-51
Mrpl17	1.12353e-55	0.29612	0.966	0.91	3.1459e-51
Fbxo22	1.2788e-55	0.336901	0.783	0.555	3.58065e-51
Actb	1.33843e-55	0.29773	1	1	3.74762e-51
Cyp20a1	1.46451e-55	0.314242	0.844	0.635	4.10064e-51
Cda	2.9814e-55	-0.266138	0.219	0.488	8.34792e-51
Scn1b	4.02894e-55	0.252529	0.451	0.111	1.1281e-50
Dab2	5.81741e-55	0.347063	0.753	0.462	1.62887e-50
Mef2c	9.41712e-55	-0.411489	0.758	0.879	2.63679e-50
Timp2	1.09611e-54	0.368143	0.731	0.427	3.06912e-50
Ggta1	4.74159e-54	0.322348	0.777	0.517	1.32764e-49
Hhex	1.22367e-53	-0.362013	0.43	0.681	3.42627e-49
Aes	1.35302e-53	0.252068	0.996	0.985	3.78845e-49
Spats2l	2.42793e-53	0.319838	0.698	0.385	6.7982e-49
Cdc42ep3	3.05758e-53	-0.345138	0.259	0.54	8.56123e-49
Cd47	5.18169e-53	-0.286189	0.532	0.753	1.45087e-48
Rap1a	7.46035e-53	0.314112	0.967	0.885	2.0889e-48
Ndufa8	1.06004e-52	-0.312275	0.96	0.975	2.96811e-48
Eva1b	1.2281e-52	0.32687	0.932	0.805	3.43868e-48
Rbms1	1.41097e-52	0.292036	0.95	0.864	3.95072e-48
Raph1	6.95112e-52	0.319854	0.711	0.44	1.94631e-47
Ahnak	2.29402e-51	0.334174	0.714	0.421	6.42324e-47
Foxc1	2.74314e-51	0.308027	0.735	0.44	7.6808e-47
Plac8	3.49508e-51	-0.272327	0.023	0.147	9.78624e-47
Cd24a	1.01229e-50	-0.399652	0.506	0.73	2.83441e-46
Nid1	1.08742e-50	0.339008	0.909	0.738	3.04479e-46
Ednrb	3.52537e-50	0.453969	0.978	0.895	9.87104e-46
Pnoc	3.67563e-50	-0.569096	0.044	0.198	1.02918e-45
Uaca	9.27467e-50	0.32717	0.687	0.414	2.59691e-45
Pnp	9.37168e-50	0.324284	0.912	0.774	2.62407e-45
4931406P16Rik	2.92244e-49	-0.281201	0.837	0.928	8.18283e-45
Tmem2	3.115e-49	0.341041	0.973	0.908	8.722e-45
Neurl3	3.38011e-49	-0.302389	0.128	0.344	9.4643e-45
Fam43a	3.93955e-49	-0.304868	0.355	0.592	1.10307e-44
Itm2a	4.41434e-49	-0.679787	0.848	0.897	1.23602e-44
Dynll1	8.16309e-49	0.322539	0.999	0.998	2.28567e-44
Gm43194	2.30736e-48	0.293247	0.735	0.468	6.46061e-44
Adam10	3.3043e-48	-0.340498	0.888	0.938	9.25204e-44
Cfh	4.70348e-48	0.343013	0.732	0.416	1.31697e-43
Gata6	9.83028e-48	0.364312	0.821	0.604	2.75248e-43
Hes1	1.20695e-47	0.281227	0.624	0.311	3.37945e-43
Cdc42ep2	2.14163e-47	0.326086	0.612	0.309	5.99656e-43
Snrk	2.19713e-47	0.302984	0.821	0.591	6.15197e-43
Junb	3.83031e-47	-0.794609	0.39	0.596	1.07249e-42
1810011O10Rik	1.00388e-46	-0.388499	0.244	0.48	2.81086e-42
Tubb2a	1.94054e-46	0.382637	0.784	0.547	5.43352e-42
Net1	3.73839e-46	-0.310149	0.418	0.653	1.04675e-41
Cd59a	1.05321e-45	-0.389206	0.926	0.953	2.94899e-41
Anxa2	2.33809e-45	0.329761	0.991	0.949	6.54664e-41
Ucp2	2.79021e-45	0.363153	0.94	0.854	7.8126e-41
Tspan14	3.88602e-45	-0.325695	0.785	0.871	1.08809e-40
Slk	5.61701e-45	-0.332706	0.785	0.899	1.57276e-40
Cd151	7.57957e-45	0.274683	0.947	0.854	2.12228e-40
Myct1	8.64737e-45	-0.307188	0.482	0.714	2.42126e-40
Clec4g	4.03143e-44	0.263737	0.358	0.075	1.1288e-39
Dpysl3	5.09114e-44	0.266562	0.82	0.596	1.42552e-39
Gbp4	1.54516e-43	0.266937	0.437	0.149	4.32646e-39
Dusp3	1.59014e-43	0.326343	0.778	0.573	4.45238e-39
Afap1l1	1.64327e-43	0.291986	0.94	0.823	4.60115e-39
Ckb	3.7123e-43	0.435679	0.575	0.304	1.03944e-38
Ipo11	5.40271e-43	0.254259	0.932	0.807	1.51276e-38
Mal	6.62149e-43	0.295442	0.249	0.002	1.85402e-38
Id1	8.23044e-43	0.305381	0.78	0.516	2.30452e-38
Rhoc	1.26005e-42	0.303854	0.966	0.895	3.52813e-38
Smc4	2.77699e-42	0.418839	0.816	0.643	7.77558e-38
Akap12	1.24775e-41	0.465078	0.841	0.669	3.49371e-37
Clca3a1	4.00947e-41	0.311412	0.722	0.462	1.12265e-36
Ifngr2	9.5927e-41	0.256157	0.76	0.529	2.68596e-36
Baiap2	1.16119e-40	0.255944	0.719	0.48	3.25134e-36
Ogt	1.75336e-40	-0.283358	0.755	0.872	4.9094e-36
Litaf	1.94486e-40	0.276261	0.781	0.584	5.44561e-36
Nnat	2.99804e-40	-0.373854	0.612	0.812	8.3945e-36
Fosb	3.3631e-40	-0.333021	0.09	0.262	9.41667e-36
C1qtnf6	9.91536e-40	0.253473	0.764	0.548	2.7763e-35
Selenbp1	2.53705e-39	0.273519	0.614	0.345	7.10374e-35
Creb3l2	3.27141e-39	-0.300215	0.665	0.8	9.15995e-35
Galnt1	3.62694e-39	0.257422	0.836	0.671	1.01554e-34
Abi3	4.02585e-39	0.257469	0.821	0.656	1.12724e-34
Cd93	5.05706e-39	0.289105	0.965	0.899	1.41598e-34
P4ha3	1.07072e-38	-0.267668	0.277	0.489	2.99802e-34
Limd2	1.19637e-38	0.251886	0.969	0.92	3.34985e-34
Cald1	1.37863e-38	0.254433	0.981	0.964	3.86018e-34
Nxn	1.42862e-38	0.296742	0.806	0.64	4.00013e-34
Meis2	1.8231e-38	-0.355852	0.919	0.948	5.10468e-34
Map1b	3.49495e-38	0.315986	0.856	0.687	9.78586e-34
Slc29a1	4.59758e-38	0.301291	0.855	0.669	1.28732e-33
H1f0	1.04621e-35	-0.365127	0.819	0.895	2.9294e-31
Ppp1r2	1.1606e-35	0.285002	0.96	0.931	3.24969e-31
Filip1l	3.23414e-35	-0.318869	0.376	0.576	9.05558e-31
Mxd4	3.86233e-35	0.257981	0.949	0.885	1.08145e-30
H2afx	5.11953e-35	-0.287312	0.727	0.823	1.43347e-30
Jund	7.57056e-35	-0.535609	0.966	0.98	2.11976e-30
Lyve1	1.83664e-34	-0.534267	0.183	0.375	5.14258e-30
Kdr	1.88861e-34	-0.332709	0.931	0.962	5.28812e-30
Slc9a3r2	3.00882e-34	0.334184	0.926	0.782	8.4247e-30
Hist1h1c	8.91249e-34	-0.279835	0.213	0.409	2.4955e-29
Isyna1	1.55461e-33	-0.26183	0.687	0.827	4.3529e-29
Emp3	2.14916e-33	0.288749	0.942	0.815	6.01764e-29
Cytl1	3.73367e-33	0.375548	0.26	0.044	1.04543e-28
Vwf	7.38519e-33	-0.353186	0.544	0.714	2.06785e-28
Zfp36	9.18967e-33	-0.413164	0.134	0.306	2.57311e-28
Zfp36l2	3.33368e-32	-0.320659	0.562	0.709	9.33431e-28
Fnbp1l	4.69283e-32	-0.280622	0.886	0.926	1.31399e-27
Basp1	7.07214e-32	-0.314883	0.654	0.822	1.9802e-27
Ccl2	1.35497e-31	0.266463	0.2	0.007	3.79391e-27
Jak1	1.66141e-31	-0.267135	0.858	0.905	4.65194e-27
Socs3	3.60063e-31	-0.64869	0.247	0.426	1.00818e-26
Cd9	3.78467e-31	-0.275424	0.826	0.935	1.05971e-26
Erg	4.61255e-31	-0.251053	0.569	0.723	1.29152e-26
Fn1	4.9642e-31	-0.454615	0.996	0.993	1.38998e-26
Ctgf	1.17311e-30	-0.358746	0.092	0.241	3.2847e-26
Sepp1	2.10242e-30	-0.290769	0.784	0.869	5.88679e-26
Tnni1	6.86264e-28	0.482888	0.793	0.663	1.92154e-23
2021-09-06	7.72099e-28	-0.254582	0.454	0.627	2.16188e-23
Ackr3	6.79107e-27	-0.34253	0.886	0.876	1.9015e-22
Txnip	2.23424e-26	0.259148	0.96	0.894	6.25587e-22
Hapln1	4.4502e-26	0.257572	0.723	0.462	1.24606e-21
Ifi27	7.02021e-26	0.277094	0.624	0.424	1.96566e-21
Tagln2	8.45326e-26	0.265352	0.991	0.98	2.36691e-21
Fbln2	2.43334e-25	-0.458782	0.236	0.393	6.81336e-21
Ap3s1	3.94606e-25	-0.253936	0.756	0.802	1.1049e-20
Sparcl1	1.1423e-24	-0.384912	0.162	0.316	3.19844e-20
Stmn2	1.97327e-24	-0.321534	0.131	0.283	5.52517e-20
Meg3	3.67087e-24	-0.491294	0.401	0.592	1.02784e-19
Arl4c	6.43863e-24	-0.251742	0.518	0.661	1.80282e-19
Ripply3	8.07853e-24	-0.268992	0.432	0.597	2.26199e-19
Fos	4.32489e-21	-0.837336	0.322	0.465	1.21097e-16
Tuba1a	9.52942e-20	0.311514	0.96	0.938	2.66824e-15
Jun	3.47885e-19	-0.663383	0.859	0.882	9.74078e-15
Igf1	6.67003e-18	-0.313312	0.822	0.853	1.86761e-13
Arl4a	1.75974e-16	-0.259482	0.8	0.846	4.92726e-12
Bmyc	3.05831e-15	-0.257299	0.865	0.881	8.56327e-11
Timp3	5.57808e-15	-0.518687	0.606	0.666	1.56186e-10
Dusp1	8.43905e-15	-0.385109	0.447	0.547	2.36293e-10
Btg2	1.61247e-14	-0.319837	0.587	0.668	4.51492e-10
Xist	2.48051e-14	-0.307962	0.385	0.535	6.94542e-10
Klf4	4.28832e-14	-0.316258	0.396	0.532	1.20073e-09
Hist1h2bc	1.10776e-13	-0.312174	0.241	0.362	3.10172e-09
Rhob	2.74306e-12	-0.271221	0.852	0.876	7.68056e-08
Sgk1	1.45987e-11	-0.299423	0.544	0.606	4.08762e-07
Ctla2a	1.55572e-11	0.253434	0.952	0.91	4.35602e-07
Ier2	4.72417e-11	-0.324164	0.952	0.941	1.32277e-06
Atf3	0.00227836	-0.347356	0.281	0.313	1
Klf2	0.0356172	-0.322517	0.917	0.861	1
Gm42418	0.537302	-0.29559	1	0.998	1
Gadd45g	0.634672	-0.285968	0.347	0.326	1
